# Supplementary material
Source: MDPI journal article supplement (https://www.mdpi.com/2071-1050/14/5/2700)
Supplement: s1 [file s1]

| days after<br>unit<br>gridded to<br>electricity | flag<br>indicating<br>the<br>refueling | oil<br>temperrature | water<br>content | H2   | CH4  | C2H6 | C2H2 | C2H4  | TH    | CO     | CO2   |
|-------------------------------------------------|----------------------------------------|---------------------|------------------|------|------|------|------|-------|-------|--------|-------|
| NaN                                             | 1                                      | NaN                 | NaN              | NaN  | NaN  | NaN  | NaN  | NaN   | NaN   | NaN    | NaN   |
| 78                                              | 0                                      | NaN                 | 9.32             | 9.45 | 11.9 | 1.06 | NaN  | 0.58  | 586   | 1846   | 13.5  |
| 221                                             | 0                                      | NaN                 | 4.99             | 4    | 8.4  | 0.6  | 0.01 | 0.55  | 617   | 1377   | 9.55  |
| 321                                             | 0                                      | NaN                 | 16.19            | NaN  | NaN  | NaN  | NaN  | NaN   | NaN   | NaN    | NaN   |
| 322                                             | 0                                      | NaN                 | 8.25             | NaN  | NaN  | NaN  | NaN  | NaN   | NaN   | NaN    | NaN   |
| 324                                             | 0                                      | NaN                 | NaN              | 8.16 | 11   | 0.01 | 0.01 | 0.01  | 572   | 1503   | 11    |
| 337                                             | 2                                      | NaN                 | NaN              | NaN  | NaN  | NaN  | NaN  | NaN   | NaN   | NaN    | NaN   |
| 369                                             | 0                                      | NaN                 | 16.73            | NaN  | NaN  | NaN  | NaN  | NaN   | NaN   | NaN    | NaN   |
| 474                                             | 0                                      | NaN                 | NaN              | 6.5  | 12   | 2.7  | 0.01 | 3.6   | 562.6 | 1895.3 | 18.31 |
| 568                                             | 0                                      | NaN                 | 5.507            | 5.6  | 10.3 | 1.53 | 0.01 | 3.3   | 554   | 1554   | 15.1  |
| 659                                             | 0                                      | NaN                 | 11.71            | 5.6  | 8.7  | 2.58 | 0.01 | 1.66  | 405.8 | 1764.6 | 12.94 |
| 691                                             | 0                                      | NaN                 | 6.69             | 4.53 | 9.7  | 2.3  | NaN  | 1.4   | 568.3 | 1398.4 | 13.4  |
| 707                                             | 3                                      | NaN                 | NaN              | NaN  | NaN  | NaN  | NaN  | NaN   | NaN   | NaN    | NaN   |
| 747                                             | 0                                      | NaN                 | NaN              | 5.16 | 12.2 | 2.18 | 0.01 | 2.17  | 603.9 | 2366.7 | 16.6  |
| 839                                             | 0                                      | NaN                 | NaN              | 7.5  | 20.6 | 4.55 | 0.01 | 7.24  | 610.2 | 2154.7 | 32.39 |
| 931                                             | 0                                      | NaN                 | NaN              | 8.4  | 26.1 | 7.4  | NaN  | 10.8  | 627   | 1882.4 | 44.3  |
| 1054                                            | 0                                      | NaN                 | 10.43            | 7.34 | 30.5 | 8.89 | NaN  | 12.2  | 648.8 | 2144.2 | 51.6  |
| 1063                                            | 0                                      | NaN                 | 10.06            | 8.41 | 31   | 8.62 | 0.01 | 12    | 695   | 2067   | 51.7  |
| 1083                                            | 4                                      | NaN                 | NaN              | NaN  | NaN  | NaN  | NaN  | NaN   | NaN   | NaN    | NaN   |
| 1194                                            | 0                                      | NaN                 | 8.39             | 5.8  | 27.1 | 8.3  | NaN  | 11    | 641.1 | 2318.5 | 46.3  |
| 1287                                            | 0                                      | NaN                 | NaN              | 5.17 | 25.2 | 7.21 | 0.01 | 10.16 | 599   | 1787   | 42.6  |

| days after<br>unit<br>gridded to<br>electricity | flag<br>indicating<br>the<br>refueling | oil<br>temperrature | water<br>content | H2   | CH4   | C2H6 | C2H2 | C2H4  | TH    | CO     | CO2  |
|-------------------------------------------------|----------------------------------------|---------------------|------------------|------|-------|------|------|-------|-------|--------|------|
| 1384                                            | 0                                      | 37                  | NaN              | 5.17 | 28.14 | 9.24 | 0.01 | 12.42 | 617.3 | 2092.4 | 49.8 |
| 1411                                            | 5                                      | NaN                 | NaN              | NaN  | NaN   | NaN  | NaN  | NaN   | NaN   | NaN    | NaN  |
| 1424                                            | 0                                      | 28                  | 5.75             | 6.3  | 36.2  | 9.8  | NaN  | 12.3  | 706.8 | 2341.8 | 58.3 |
| 1436                                            | 0                                      | 30                  | 5.2              | 8.4  | 30    | 10.3 | 0.2  | 13.8  | 675.4 | 2077.6 | 54.6 |
| 1449                                            | 0                                      | 32                  | 8.3              | 8.3  | 31.7  | 9.5  | 0.2  | 13.2  | 625   | 2010   | 54.6 |
| 1477                                            | 0                                      | 45                  | NaN              | 8.9  | 36.2  | 11.5 | 0.2  | 13.9  | 732   | 2649   | 61.8 |
| 1526                                            | 0                                      | 42                  | NaN              | 9.46 | 36    | 11.1 | 0.18 | 14.4  | 747   | 2783.1 | 61.7 |
| 1567                                            | 0                                      | 37                  | NaN              | 7.23 | 34.4  | 9.58 | 0.17 | 13.5  | 727.2 | 2761.2 | 57.7 |
| 1616                                            | 0                                      | 26                  | 7.2              | 6.01 | 32.1  | 9.85 | 0.16 | 13.8  | 719   | 2260.6 | 56   |
| 1637                                            | 0                                      | 23                  | NaN              | 6.07 | 33.5  | 9.82 | 0.15 | 14.4  | 745.5 | 2459.5 | 57.8 |
| 1672                                            | 0                                      | NaN                 | NaN              | 10   | 40.7  | 6.3  | 0.11 | 11.5  | 1184  | 2179   | 58.6 |
| 1700                                            | 0                                      | 29                  | NaN              | 6.25 | 34.9  | 10.3 | 0.15 | 14.7  | 747.2 | 2247.6 | 60   |
| 1734                                            | 0                                      | 34                  | NaN              | 5.99 | 33.3  | 9.61 | 0.13 | 13.3  | 726.7 | 2319.3 | 56.3 |
| 1785                                            | 0                                      | 31                  | 8.28             | 5.09 | 29.9  | 9.79 | 0.11 | 12.1  | 675.5 | 2173.3 | 51.9 |
| 1801                                            | 0                                      | 27                  | 8                | 6.49 | 29.9  | 8.78 | 0.21 | 11.6  | 630   | 1973   | 50.5 |
| 1804                                            | 0                                      | 28                  | 8.1              | 7.18 | 31.7  | 10.4 | 0.22 | 12.9  | 716   | 2292   | 55.2 |
| 1807                                            | 6                                      | NaN                 | NaN              | NaN  | NaN   | NaN  | NaN  | NaN   | NaN   | NaN    | NaN  |
| 1810                                            | 0                                      | 35                  | NaN              | 7.36 | 31.5  | 10.5 | 0.22 | 13.4  | 705.9 | 2091.6 | 55.7 |
| 1832                                            | 0                                      | 44                  | NaN              | 9.93 | 32.1  | 10.8 | 0.24 | 14.1  | 894   | 2635   | 57.3 |
| 1938                                            | 0                                      | NaN                 | NaN              | 6    | 28.9  | 8.5  | 0.15 | 11.6  | 561.8 | 2593.4 | 49.2 |
| 2021                                            | 0                                      | 22                  | 6.4              | 12.3 | 37.2  | 12.2 | 0.21 | 15.9  | 964   | 3087   | 65.3 |

| days after<br>unit<br>gridded to<br>electricity | flag<br>indicating<br>the<br>refueling | oil<br>temperrature | water<br>content | H2   | CH4   | C2H6  | C2H2 | C2H4  | TH     | CO     | CO2   |
|-------------------------------------------------|----------------------------------------|---------------------|------------------|------|-------|-------|------|-------|--------|--------|-------|
| 2045                                            | 0                                      | NaN                 | 3.8              | 12.5 | 46.32 | 15.25 | 0.23 | 23.81 | 758    | 2686   | 85.72 |
| 2046                                            | 0                                      | 22                  | 3.4              | 12.3 | 45    | 14.5  | 0.23 | 22.9  | 2621.7 | 847.2  | 82.6  |
| 2065                                            | 0                                      | NaN                 | 4.2              | 12.5 | 46.8  | 13.9  | 0.24 | 25.7  | 821    | 2596   | 86.6  |
| 2085                                            | 0                                      | 24                  | 5.7              | 13.3 | 47.7  | 14.8  | 0.23 | 26.3  | 801    | 2501   | 89.1  |
| 2093                                            | 0                                      | 33                  | 4.6              | 12.7 | 46.9  | 15.3  | 0.22 | 25.7  | 788.9  | 2993   | 88.1  |
| 2107                                            | 0                                      | 37                  | NaN              | 13.9 | 48.6  | 13.3  | 0.2  | 25.3  | 804.3  | 2661.6 | 87.4  |
| 2128                                            | 0                                      | 35                  | 6.3              | 14.1 | 48.4  | 14    | 0.23 | 26    | 837.2  | 2734.8 | 88.6  |
| 2151                                            | 0                                      | NaN                 | 6.1              | NaN  | 0.42  | 0.29  | 0.01 | 0.42  | 17.2   | 117    | 1.13  |
| 2152                                            | 0                                      | NaN                 | 6.2              | NaN  | 1.05  | 1.23  | NaN  | 0.26  | 4.47   | 60.2   | 2.54  |
| 2154                                            | 0                                      | 46                  | 8.2              | NaN  | 0.56  | 0.31  | NaN  | 0.14  | 4      | 79.5   | 1.01  |
| 2156                                            | 0                                      | 30                  | 4.4              | NaN  | 0.79  | 0.56  | 0.01 | 0.24  | 16.7   | 298    | 1.59  |
| 2164                                            | 0                                      | 35                  | NaN              | NaN  | 1.7   | 0.92  | 0.2  | 0.73  | 16.7   | 258.3  | 3.55  |
| 2167                                            | 0                                      | 32                  | 5.3              | NaN  | 1.9   | 0.86  | 0.18 | 0.5   | 20.6   | 345    | 3.44  |
| 2174                                            | 0                                      | 29                  | 6.4              | NaN  | 2.1   | 0.97  | 0.2  | 0.94  | 30.4   | 323.4  | 4.21  |
| 2180                                            | 7                                      | NaN                 | NaN              | NaN  | NaN   | NaN   | NaN  | NaN   | NaN    | NaN    | NaN   |
| 2553                                            | 0                                      | 46                  | 8.2              | 5.8  | 7.99  | 1.5   | 0.09 | 3.2   | 151    | 1699   | 12.69 |
| 2666                                            | 0                                      | 37                  | 6.2              | 6.1  | 9     | 1.7   | 0.1  | 3.1   | 180    | 1992   | 13.9  |
| 2702                                            | 0                                      | 18                  | 5.8              | 6.27 | 9.1   | 2.27  | 0.01 | 4.07  | 187.8  | 2046   | 15.44 |
| 2714                                            | 0                                      | 24                  | 5.7              | 6.49 | 8.6   | 1.8   | NaN  | 4.49  | 167.5  | 1826.1 | 14.9  |
| 2717                                            | 0                                      | 30                  | 5.4              | 6.24 | 8.4   | 1.8   | NaN  | 4.1   | 159.5  | 1816   | 14.3  |
| 2750                                            | 0                                      | 24                  | 3.6              | 6.7  | 11.6  | 2.9   | NaN  | 5.1   | 167.5  | 1860   | 19.6  |

| days after<br>unit<br>gridded to<br>electricity | flag<br>indicating<br>the<br>refueling | oil<br>temperrature | water<br>content | H2   | CH4  | C2H6 | C2H2 | C2H4 | TH    | CO     | CO2  |
|-------------------------------------------------|----------------------------------------|---------------------|------------------|------|------|------|------|------|-------|--------|------|
| 2793                                            | 0                                      | 32                  | 3.6              | 7    | 12.2 | 4.3  | 0.24 | 7.5  | 182.5 | 1900   | 24.2 |
| 2800                                            | 0                                      | 34                  | 3.2              | 6.2  | 10.7 | 4.1  | 0.19 | 7.9  | 154.9 | 1839.3 | 22.9 |
| 2841                                            | 0                                      | 35                  | 3.3              | 5.5  | 12.1 | 2.66 | 0.13 | 7.25 | 175   | 1555   | 22.2 |
| 2850                                            | 0                                      | 34                  | 3.7              | 13.9 | 18.6 | 4.14 | 0.31 | 14.6 | 197   | 1976   | 37.7 |
| 2905                                            | 0                                      | 34                  | 6.4              | 12.3 | 18.6 | 4.3  | 0.16 | 13.8 | 198   | 1689   | 36.9 |
| 2909                                            | 0                                      | 32                  | 5.3              | 14.1 | 18.9 | 4.5  | 0.17 | 13.7 | 209   | 1703   | 37.1 |
| 2912                                            | 9                                      | NaN                 | NaN              | NaN  | NaN  | NaN  | NaN  | NaN  | NaN   | NaN    | NaN  |
| 2923                                            | 0                                      | 48                  | 6.8              | 10.3 | 18.6 | 3.65 | 0.18 | 12.3 | 200.5 | 1720.7 | 34.8 |
| 3021                                            | 0                                      | 40                  | 4.1              | 13.5 | 24   | 6.03 | 0.11 | 18.3 | 242   | 2176   | 48.4 |
| 3114                                            | 0                                      | 22                  | 3                | 11.7 | 25.9 | 5.5  | 0.18 | 17.9 | 264   | 1982   | 49.5 |
| 3204                                            | 0                                      | 34                  | 2.7              | 9.3  | 24.9 | 6.1  | 0.15 | 18.5 | 245   | 1877   | 49.7 |
| 3246                                            | 0                                      | 43                  | 5.8              | 9.3  | 24.9 | 6.1  | 0.1  | 18.5 | 245   | 1877   | 49.6 |
| 3267                                            | 0                                      | NaN                 | 20.4             | NaN  | NaN  | NaN  | NaN  | NaN  | NaN   | NaN    | NaN  |
| 3281                                            | 0                                      | 24                  | 5.5              | 12   | 26.2 | 6    | 0.11 | 18.7 | 276   | 2013   | 51   |
| 3285                                            | 0                                      | 23                  | 5                | 11.4 | 24.5 | 5.5  | 0.11 | 17.3 | 257   | 1891   | 47.4 |
| 3287                                            | 0                                      | NaN                 | 4.9              | NaN  | NaN  | NaN  | NaN  | NaN  | NaN   | NaN    | NaN  |
| 3293                                            | 10                                     | NaN                 | NaN              | NaN  | NaN  | NaN  | NaN  | NaN  | NaN   | NaN    | NaN  |
| 3312                                            | 0                                      | 48                  | 5.5              | 10.2 | 26.4 | 6.4  | NaN  | 19.4 | 280   | 1974   | 52.3 |
| 3380                                            | 0                                      | 38                  | 4.7              | 10   | 27.6 | 6.4  | NaN  | 21.9 | 308   | 2223   | 55.9 |
| 3479                                            | 0                                      | 25                  | 4.1              | 7.3  | 28   | 7    | NaN  | 20.3 | 317   | 2210   | 55.4 |
| 3609                                            | 0                                      | 30                  | 5.1              | 6    | 28.2 | 7.7  | 0.12 | 20.5 | 331   | 2215   | 56.6 |

| days after<br>unit<br>gridded to<br>electricity | flag<br>indicating<br>the<br>refueling | oil<br>temperrature | water<br>content | H2   | CH4  | C2H6 | C2H2 | C2H4 | TH  | CO   | CO2  |
|-------------------------------------------------|----------------------------------------|---------------------|------------------|------|------|------|------|------|-----|------|------|
| 3653                                            | 0                                      | 37                  | NaN              | 5.33 | 24.4 | 6.73 | NaN  | 17.7 | 296 | 2147 | 48.9 |
| 3749                                            | 0                                      | NaN                 | NaN              | 4.3  | 26.7 | 6.79 | 0.15 | 17.8 | 343 | 2255 | 51.4 |
| 3840                                            | 0                                      | 22                  | 4.7              | 3.8  | 28.6 | 7.6  | 0.12 | 19.6 | 365 | 2129 | 55.9 |
| 3876                                            | 0                                      | NaN                 | 3                | NaN  | NaN  | NaN  | NaN  | NaN  | NaN | NaN  | NaN  |
| 3879                                            | 0                                      | NaN                 | 4.1              | NaN  | NaN  | NaN  | NaN  | NaN  | NaN | NaN  | NaN  |
| 3884                                            | 0                                      | 10                  | 5.1              | 4.2  | 26.4 | 7.3  | 0.1  | 17.8 | 385 | 2229 | 52   |
| 3892                                            | 0                                      | NaN                 | 2.2              | NaN  | NaN  | NaN  | NaN  | NaN  | NaN | NaN  | NaN  |
| 3896                                            | 0                                      | 18                  | 3.6              | 4.1  | 28.2 | 7.8  | 0.1  | 19.7 | 387 | 2535 | 55.8 |
| 3904                                            | 11                                     | NaN                 | NaN              | NaN  | NaN  | NaN  | NaN  | NaN  | NaN | NaN  | NaN  |
| 3914                                            | 0                                      | 24                  | 3.5              | 10.3 | 38.1 | 9.8  | 0.29 | 32.4 | 393 | 1921 | 80.6 |
| 3918                                            | 0                                      | NaN                 | NaN              | 23.1 | 61   | 16   | 0.39 | 60.8 | 371 | 2063 | 138  |
| 3919                                            | 0                                      | NaN                 | 3.8              | 23.8 | 64.3 | 17.6 | 0.39 | 66.3 | 368 | 2128 | 149  |
| 3920                                            | 0                                      | NaN                 | NaN              | 24.5 | 65.8 | 17.6 | 0.39 | 67   | 384 | 2177 | 151  |
| 3921                                            | 0                                      | NaN                 | NaN              | 23.9 | 65.1 | 18.5 | 0.35 | 67.1 | 383 | 2178 | 151  |
| 3922                                            | 0                                      | NaN                 | NaN              | 23.6 | 65.3 | 18.2 | 0.4  | 67.2 | 385 | 2210 | 151  |
| 3924                                            | 0                                      | NaN                 | NaN              | 22.8 | 65.5 | 18.2 | 0.39 | 66.4 | 363 | 2133 | 151  |
| 3925                                            | 0                                      | 33                  | 3.7              | 24   | 66.6 | 18.1 | 0.4  | 66.1 | 382 | 2208 | 151  |
| 3928                                            | 0                                      | 34                  | 3.3              | 22.2 | 63.7 | 17.4 | 0.36 | 66.8 | 361 | 2371 | 148  |
| 3934                                            | 0                                      | 32                  | 3.4              | 22.6 | 64.5 | 18   | 0.29 | 65.9 | 398 | 2218 | 149  |
| 3936                                            | 0                                      | NaN                 | 4.1              | 31.5 | 80.8 | 20.9 | 0.46 | 79   | 407 | 2250 | 181  |
| 3937                                            | 0                                      | 34                  | NaN              | 32.9 | 79.6 | 20   | 0.4  | 76   | 395 | 2258 | 176  |

| days after<br>unit<br>gridded to<br>electricity | flag<br>indicating<br>the<br>refueling | oil<br>temperrature | water<br>content | H2   | CH4  | C2H6 | C2H2 | C2H4 | TH  | CO   | CO2   |
|-------------------------------------------------|----------------------------------------|---------------------|------------------|------|------|------|------|------|-----|------|-------|
| 3938                                            | 0                                      | 34                  | 3.6              | 35.2 | 77   | 24.5 | 0.52 | 93.5 | 394 | 2306 | 196   |
| 3939                                            | 0                                      | 34                  | 5.1              | 33   | 84.7 | 24   | 0.53 | 91.1 | 397 | 2346 | 200   |
| 3940                                            | 0                                      | 34                  | 4                | 35   | 86.7 | 25.2 | 0.48 | 94.5 | 399 | 2317 | 207   |
| 3947                                            | 0                                      | 32                  | 4.4              | 36.2 | 86.4 | 24.1 | 0.48 | 89.3 | 374 | 2225 | 200   |
| 3954                                            | 0                                      | 39                  | 4.8              | 37.6 | 90   | 25   | 0.51 | 95.8 | 385 | 2316 | 211   |
| 3962                                            | 0                                      | NaN                 | NaN              | 38.7 | 91.5 | 25.1 | 0.51 | 96.2 | 404 | 2418 | 213   |
| 3983                                            | 0                                      | 40                  | NaN              | 36.9 | 90.9 | 25.6 | 0.5  | 95.5 | 396 | 2755 | 212   |
| 4012                                            | 0                                      | 44                  | 5.7              | 39   | 101  | 27.2 | 0.54 | 102  | 428 | 2806 | 231   |
| 4045                                            | 0                                      | NaN                 | NaN              | 35.8 | 97   | 28.1 | 0.48 | 102  | 436 | 3025 | 227   |
| 4057                                            | 0                                      | NaN                 | 6.7              | NaN  | NaN  | NaN  | NaN  | NaN  | NaN | NaN  | NaN   |
| 4081                                            | 0                                      | 39                  | NaN              | 28.6 | 94.9 | 28.2 | 0.46 | 99.3 | 451 | 3023 | 223   |
| 4103                                            | 0                                      | NaN                 | NaN              | 32.6 | 99.9 | 26.1 | 0.45 | 97   | 444 | 3118 | 223   |
| 4115                                            | 0                                      | 38                  | NaN              | 29.8 | 97.3 | 26   | 0.44 | 96   | 442 | 2963 | 220   |
| 4156                                            | 0                                      | NaN                 | NaN              | 27.1 | 98.8 | 27   | 0.4  | 96.4 | 467 | 2921 | 222   |
| 4204                                            | 0                                      | 26                  | NaN              | 26.7 | 98.3 | 27.7 | 0.38 | 96   | 474 | 2906 | 222   |
| 4296                                            | 0                                      | 28                  | 8.2              | 26.2 | 97.1 | 27.3 | 0.35 | 92.8 | 468 | 2850 | 218   |
| 4386                                            | 0                                      | 48                  | NaN              | 25.9 | 98   | 27   | 0.3  | 94   | 491 | 3121 | 219   |
| 4404                                            | 0                                      | 37                  | 12.7             | 17.8 | 97.2 | 26.7 | 0.26 | 92.7 | 525 | 3387 | 216.9 |
| 4412                                            | 0                                      | NaN                 | 11               | NaN  | NaN  | NaN  | NaN  | NaN  | NaN | NaN  | NaN   |
| 4413                                            | 0                                      | NaN                 | 12.4             | NaN  | NaN  | NaN  | NaN  | NaN  | NaN | NaN  | NaN   |
| 4417                                            | 0                                      | 38                  | 7.1              | NaN  | 1    | 0.31 | NaN  | 0.37 | 6.7 | 258  | 1.7   |

| days after<br>unit<br>gridded to<br>electricity | flag<br>indicating<br>the<br>refueling | oil<br>temperrature | water<br>content | H2  | CH4  | C2H6 | C2H2 | C2H4 | TH   | CO   | CO2  |
|-------------------------------------------------|----------------------------------------|---------------------|------------------|-----|------|------|------|------|------|------|------|
| 4425                                            | 0                                      | 38                  | NaN              | NaN | 1.2  | 0.42 | NaN  | 0.69 | 14   | 312  | 2.4  |
| 4427                                            | 0                                      | 38                  | NaN              | NaN | 1.67 | 0.49 | NaN  | 1.04 | 14.6 | 325  | 3.2  |
| 4432                                            | 0                                      | 38                  | NaN              | NaN | 2.1  | 0.52 | NaN  | 1.2  | 30.9 | 415  | 3.8  |
| 4443                                            | 12                                     | NaN                 | NaN              | NaN | NaN  | NaN  | NaN  | NaN  | NaN  | NaN  | NaN  |
| 4446                                            | 0                                      | NaN                 | 8.9              | NaN | 3.1  | 0.4  | NaN  | 1.5  | 30   | 465  | 5    |
| 4453                                            | 0                                      | 42                  | NaN              | NaN | 3.3  | 0.58 | NaN  | 2.5  | 32.2 | 629  | 6.4  |
| 4477                                            | 0                                      | NaN                 | NaN              | NaN | 3.7  | 0.8  | NaN  | 3.1  | 40.6 | 741  | 7.6  |
| 4568                                            | 0                                      | 24                  | NaN              | 5   | 5.1  | 0.86 | 0.1  | 4    | 68.8 | 882  | 10   |
| 4587                                            | 0                                      | NaN                 | NaN              | 5   | 5.3  | 1.1  | 0.11 | 4.3  | 64.7 | 881  | 10.8 |
| 4659                                            | 0                                      | NaN                 | 4.3              | 5   | 6.4  | 1.2  | 0.1  | 4.6  | 80.8 | 1027 | 12.2 |
| 4736                                            | 0                                      | NaN                 | NaN              | 5   | 7.4  | 1.4  | 0.1  | 5.2  | 124  | 1394 | 14.2 |
| 4842                                            | 0                                      | NaN                 | NaN              | 5   | 8.7  | 1.4  | 0.1  | 5.2  | 189  | 1622 | 15.3 |
| 4932                                            | 0                                      | NaN                 | NaN              | 5   | 8.8  | 1.6  | 0.1  | 6.3  | 208  | 1595 | 16.7 |
| 4957                                            | 0                                      | NaN                 | 5.8              | NaN | NaN  | NaN  | NaN  | NaN  | NaN  | NaN  | NaN  |
| 4979                                            | 0                                      | NaN                 | NaN              | 5   | 9.6  | 1.6  | 0.2  | 6.1  | 200  | 1247 | 17.5 |
| 4984                                            | 13                                     | NaN                 | NaN              | NaN | NaN  | NaN  | NaN  | NaN  | NaN  | NaN  | NaN  |
| 4988                                            | 0                                      | NaN                 | NaN              | 5   | 9.4  | 1.7  | 0.21 | 6.4  | 182  | 1283 | 17.7 |
| 5002                                            | 0                                      | NaN                 | NaN              | 5.6 | 10.9 | 2.1  | 0.27 | 7.3  | 224  | 1551 | 20.6 |
| 5009                                            | 0                                      | NaN                 | NaN              | 5.6 | 10.5 | 2    | 0.29 | 6.5  | 219  | 1418 | 19.2 |
| 5010                                            | 0                                      | NaN                 | NaN              | 5.6 | 10.5 | 2    | 0.29 | 6.5  | 219  | 1418 | 19.2 |
| 5023                                            | 0                                      | NaN                 | 7.1              | 5   | 10   | 1.9  | 0.1  | 5.7  | 207  | 1526 | 17.7 |

| days after<br>unit<br>gridded to<br>electricity | flag<br>indicating<br>the<br>refueling | oil<br>temperrature | water<br>content | H2  | CH4  | C2H6 | C2H2 | C2H4 | TH  | CO   | CO2  |
|-------------------------------------------------|----------------------------------------|---------------------|------------------|-----|------|------|------|------|-----|------|------|
| 5114                                            | 0                                      | NaN                 | NaN              | 5   | 10.8 | 1.9  | 0.2  | 6.3  | 251 | 1875 | 19.2 |
| 5205                                            | 0                                      | NaN                 | NaN              | 4.4 | 12   | 2.2  | 0.14 | 6.3  | 292 | 2336 | 20.6 |
| 5296                                            | 0                                      | NaN                 | NaN              | 2.8 | 11.5 | 2.2  | 0.1  | 6.4  | 298 | 1989 | 20.1 |
| 5387                                            | 0                                      | NaN                 | 10.1             | 3.6 | 13.2 | 3.2  | 0.1  | 6.1  | 337 | 2178 | 22.6 |
